# Supplementary material for: DuoHexaBody-CD37 induces direct cytotoxic signaling in diffuse large B-cell lymphoma
Source: eLife. 2026 Jul 20;14:RP106425. doi: 10.7554/eLife.106425 (PMC13384490; doi:10.7554/eLife.106425)
Supplement: Supplementary file 1. [file elife-106425-supp1.xlsx]

## Sheet: Table 1
Supplementary file 1
DuoHexaBody-CD37 mediated phosphoprotein modulation target list
Phosphosite ID	B cells			U2932			Oci-Ly7
	Untreated	DuoHexaBody-CD37	DuoHexaBody-CD37 +a-Fc	Untreated	DuoHexaBody-CD37	DuoHexaBody-CD37 +a-Fc	Untreated	DuoHexaBody-CD37	DuoHexaBody-CD37 +a-Fc
Shc_pY317	-0,39	2,4	3,02	0,91	3,32	1,83	0,93	4,02	2,28
DAPK1_pS308	1,25	1,37	0,32	0,97	1,03	1,64	1,96	0,91	1,27
RPA32_pS4_S8	1,89	1,78	0,72	0,93	1,05	1,5	1,87	0,96	1,33
PAK_pS474_S602_S560	0,94	1,01	-0,25	-0,14	0,41	-0,13	0,7	0,28	1,1
Src_pY416	1,18	1,85	2,57	2,01	0,24	0,72	0,02	0,17	0,09
FRS2-alpha_pY196	-0,42	-0,09	0,22	-0,15	0,15	-0,2	-0,35	0,2	-0,03
PI3K-p110-a	0,43	-0,87	0,6	0,4	0,44	0,39	-0,37	0,33	0,5
Akt_pS473	-1,64	-0,69	-0,97	-0,29	-0,33	-0,55	-1,27	-1,34	-1,09
FAK_pY397	0,42	1,05	1,17	1,12	0,65	0,86	-0,15	0,05	0,06
ACC_pS79	-2,61	-2,28	-1,76	0,08	-0,04	0,19	-0,98	-1,06	-1,04
Akt_pT308	-0,31	-0,04	0,34	-0,54	-0,47	-0,53	-1,12	-1,47	-1,31
CDK1_pT14	-2	-1,68	-0,86	1,27	1,3	1,29	1,54	1,47	1,53
DDR1_pY513	0,09	0,19	0,66	0,22	0,19	-0,06	0,1	0,37	0,22
EphA2_pS897	-0,75	-0,74	-0,18	-0,31	-0,45	-0,57	-0,37	-0,05	-0,29
EphA2_pY588	-0,84	-0,67	-0,22	-0,47	-0,46	-0,67	-0,66	-0,37	-0,58
HSP27_pS82	-3,68	-3,45	-2,69	-2,23	-2,48	-2,4	-1,71	-1,5	-1,62
NDRG1_pT346	-1,49	-1,22	-0,67	-1,06	-1	-1,1	-0,14	-0,07	-0,11
PKC-a-b-II_pT638_T641	2,2	2,49	3,15	1,33	1,47	1,42	0,31	0,33	0,22
PKC-delta_pS664	-0,03	-0,18	0,68	-0,17	0,13	-0,15	-0,36	-0,27	-0,15
Pyk2_pY402	0,17	0,57	1,31	0,34	0,17	0,22	-0,28	-0,24	-0,17
Rb_pS807_S811	-1,75	-1,31	-0,47	2,99	2,88	3,26	2,95	2,83	2,99
VEGFR-2_pY1175	0,27	0,79	0,89	0,02	-0,11	-0,11	-0,23	-0,1	-0,06
ACLY_pS455	1,82	1,88	0,05	0,74	0,69	1	0,54	0,08	0,29
Chk2_pT68	-0,62	0,37	-0,31	0,01	0,18	-0,16	2,73	2,74	2,48
MAPK_pT202_Y204	-1,24	-0,63	-0,95	0,56	0,42	0,52	-1,48	-1,5	-1,49
Myosin-IIa_pS1943	-0,2	0,47	0,15	-0,73	-0,63	-0,75	-0,34	-0,16	-0,45
PLC-gamma2_pY759	0,82	1,38	1,13	0,96	0,92	0,65	1,22	1,52	1,31
